# Supplementary material for: Purging viral latency by a bifunctional HSV-vectored therapeutic vaccine in chronically SIV-infected macaques
Source: eLife. 2025 Apr 23;13:RP95964. doi: 10.7554/eLife.95964 (PMC12017772; doi:10.7554/eLife.95964)
Supplement: Figure 1—source data 3. [file elife-95964-fig1-data3.xlsx]

## Sheet: Figure 1C
	Medium			HSV-wt			HSV-Δicp34.5
LTR	1	1	1	2.02957	2.15243	2.02665	435.65	458.278	430.75
Tat	1	1	1	1.75171	1.96256	1.93499	563.513	548.87	509.061
Gag	1	1	1	0.780151	1.69153	2.42709	370.542	314.426	364.01
Vif	1	1	1	1.97083	2.2035	2.2258	649.936	556.747	558.385
Vpr	1	1	1	1.95076	2.19548	2.10167	659.253	625.595	570.848

## Sheet: Figure 1D
	Medium			HSV-wt			HSV-ΔICP34.5
UL27	1	1	1	9848.77	10196.2	10499.1	4041.62	2806.28	3438.84

## Sheet: Figure 1E
		Medium			HSV-wt			HSV-ΔICP34.5
	p24	101.973	98.5326	100.253	113.526	109.583	111.555	174.912	179.134	177.023

## Sheet: Figure 1F
	mock			HSV-wt			HSV-ΔICP34.5
LTR	1	1	1	0.330683	0.359442	1.19985	7.00165	8.59209	7.69694
Tat	1	1	1	0.740773	0.364328	0.373915	4.46641	5.77154	4.77035
Gag	1	1	1	1.03169	0.410263	0.33541	4.91039	5.28479	6.2652
Vif	1	1	1	0.967553	0.303561	0.338631	6.4194	6.26242	7.39487
Vpr	1	1	1	0.455643	0.344572	1.2305	7.64353	9.64155	9.24633

## Sheet: Figure 1G
	Medium			HSV-wt			HSV-Δicp34.5
j-lat 10.6	1	1	1	6.27787	5.4365	4.63685	79.4832	86.7495	83.1164
jlat-10.6-icp34.5	1	1	1	1.98075	2.16521	1.94293	61.7651	56.4785	66.3483

## Sheet: Figure 1H
	J-Lat 10.6			J-Lat 10.6-ΔICP34.5
Medium	0.73	0.8	0.76	1.26	1.35	1.28
PMA	80.77	80.22	81.3	62.18	60.69	60.52
TNF-α	87.91	87.85	88.15	70.87	68.71	68.72
