# Supplementary material for: Purging viral latency by a bifunctional HSV-vectored therapeutic vaccine in chronically SIV-infected macaques
Source: eLife. 2025 Apr 23;13:RP95964. doi: 10.7554/eLife.95964 (PMC12017772; doi:10.7554/eLife.95964)
Supplement: Figure 2—source data 3. [file elife-95964-fig2-data3.xlsx]

## Sheet: Figure 2D
	Medium			HSV-ΔICP34.5			HSV-ΔICP34.5+1μg/mLKRIBB11			HSV-ΔICP34.5+2μg/mLKRIBB11			HSV-ΔICP34.5+4μg/mLKRIBB11
LTR	1	1	1	11.7528	12.8592	12.306	1.94421	1.9984	1.97131	0.943291	0.894323	0.918807	0.640933	0.694087	0.66751

## Sheet: Figure 2E
	Medium			HSV-ΔICP34.5			HSV-ΔICP34.5+1μg/mLKRIBB11			HSV-ΔICP34.5+2μg/mLKRIBB11			HSV-ΔICP34.5+4μg/mLKRIBB11
tat	1	1	1	9.47426	9.77547		1.26182	1.35559	1.30871	0.632174	0.619865	0.626019	0.47206	0.558038	0.515049

## Sheet: Figure 2F
	Medium			HSV-wt			HSV-ΔICP34.5
HSF1	0.836702	0.80374	0.820221	0.771072	0.879231	0.825152	4.03776	4.60025	4.31901
His	8.74313	9.10128	8.92221	10.6084	10.2404	10.4244	4.6599	4.53903	4.59947
