# Supplementary material for: Purging viral latency by a bifunctional HSV-vectored therapeutic vaccine in chronically SIV-infected macaques
Source: eLife. 2025 Apr 23;13:RP95964. doi: 10.7554/eLife.95964 (PMC12017772; doi:10.7554/eLife.95964)
Supplement: Figure 3—source data 3. [file elife-95964-fig3-data3.xlsx]

## Sheet: Figure 3F
HSV-empty		HSV-sPD1		HSV-SIVgag		HSV-sPD1-SIVgag
98	0	67	40	604	392	1592	1108

## Sheet: Figure 3G
	HSV-empty		HSV-SIVenv
Env1	0	0	32	12
Env2	0	0	200	292

## Sheet: Figure 3I
	HSV-Empty			HSV-sPD1			HSV-Gag			HSV-sPD1Gag
IFN-γ	0.06	0.03	0.02	0.01	0.01	0	0.03	0.05	0.04	0.06	0.07	0.07
IL-2	0.1	0.13	0	0.2	0.25	0.1	0.47	0.29	0.5	0.67	0.6	0.6
TNF-α	0.03	0	0.03	0.03	0.03	0.1	0.11	0.06	0.08	0.23	0.2	0.21

## Sheet: Figure 3J
	HSV-empty			HSV-sPD1			HSV-SIVgag			HSV-sPD1-SIVgag
IFN-γ	0.01	0.02	0.02	0.01	0	0	0.03	0.04	0.04	0.06	0.09	0.06
IL-2	0.03	0.01	0	0.01	0	0	0.04	0.04	0.09	0.22	0.18	0.26
TNF-α	0.03	0.07	0	0	0.05	0	0.12	0.01	0.08	0.06	0.1	0.06

## Sheet: Figure 3K
	HSV-Empty			HSV-sPD1			HSV-SIVgag			HSV-sPD1-SIVgag
IFN-γ	0.09	0	0	0.07	0.03	0	0.05	0.1	0.17	0.12	0.13	0.18
IL-2	0.1	0.2	0	0.2	0	0	0.26	0.09	0.65	0.98	0.79	0.85
TNF-α	0.1	0.2	0	0.02	0.1	0.2	0.02	0.16	0.15	0.71	0.57	0.4

## Sheet: Figure 3L
	HSV-Empty			HSV-sPD1			HSV-SIVgag			HSV-sPD1-SIVgag
CD4+ T cells	0	0	0	0	0.62	0	5.29	4.14	2.07	1.75	1.8	1.5
CD8+ T cells	0	0.42	0	0	0	0	2.25	1.79	1.9	3.82	3.46	3.38

## Sheet: Figure 3M
	HSV-Empty			HSV-Env
IFN-γ	0.2	0.37	0.2	0.63	0.82	0.7
IL-2	0.15	0	0	0.01	0.01	0
TNF-α	0.04	0.01	0.02	0.01	0.08	0.03
