# Supplementary material for: Purging viral latency by a bifunctional HSV-vectored therapeutic vaccine in chronically SIV-infected macaques
Source: eLife. 2025 Apr 23;13:RP95964. doi: 10.7554/eLife.95964 (PMC12017772; doi:10.7554/eLife.95964)
Supplement: Figure 4—source data 1. [file elife-95964-fig4-data1.xlsx]

## Sheet: Figure 4C
ART+saline			ART+HSV-ΔICP34.5ΔICP47-empty			ART+HSV-sPD1-SIVgag/SIVenv
-1092.5	-32.5	-442.5	-610	-90	1022.5	35	335	1500

## Sheet: Figure 4D
ART+saline			ART+HSV-ΔICP34.5ΔICP47-empty			ART+HSV-ΔICP34.5ΔICP47sPD1-SIVgag/SIVenv
-1420	-1127.5	-202.5	-697.5	15	-47.5	52.5	-1010	62.5

## Sheet: Figure 4E
gag-tnf	ART+saline				ART+HSV-ΔICP34.5ΔICP47-empty				ART+HSV-ΔICP34.5ΔICP47sPD1-SIVgag/SIVenv
CD4+ T cells	-0.05	-0.08	-0.18		0.02	-0.22	-0.03		0.02	0.14		-0.05
CD8+ T cells	-0.01	-0.39	-0.1		-0.36	-0.19	-0.09		0	-0.1		0.16
gag-ifn	ART+saline				ART+HSV-ΔICP34.5ΔICP47-empty				ART+HSV-ΔICP34.5ΔICP47sPD1-SIVgag/SIVenv
CD4+ T cells	0.03	-0.09	-0.07		-0.09	0	-0.07		-0.05	-0.15		0.02
CD8+ T cells	0.02	-0.15	0.02		0.24	-0.1	0.01		-0.1	-0.1		0.06
gag-il2	ART+saline				ART+HSV-ΔICP34.5ΔICP47-empty				ART+HSV-ΔICP34.5ΔICP47sPD1-SIVgag/SIVenv
CD4+ T cells	-0.12	0	0		0.12	-0.03	0.08		-0.09	-0.05		-0.06
CD8+ T cells	0.03	-0.12	-0.2		0	0	0		-0.21	-0.49		0
env-tnf	ART+saline				ART+HSV-ΔICP34.5ΔICP47-empty				ART+HSV-ΔICP34.5ΔICP47sPD1-SIVgag/SIVenv
CD4+ T cells	0.01	0.05	0.18		0.02	-0.07	0.02		0	-0.02		0
CD8+ T cells	-0.1	0.15	0		0	0.03	-0.08		0	0.09		0
env-ifn	ART+saline				ART+HSV-ΔICP34.5ΔICP47-empty				ART+HSV-ΔICP34.5ΔICP47sPD1-SIVgag/SIVenv
CD4+ T cells	-1.87	-0.25	-0.08		-0.11	-1.38	-0.34		-0.18	-0.17		-0.17
CD8+ T cells	0.03	-0.06	0.01		0.07	0	0.13		0.03	-0.24		-0.03
env-il2	ART+saline				ART+HSV-ΔICP34.5ΔICP47-empty				ART+HSV-ΔICP34.5ΔICP47sPD1-SIVgag/SIVenv
CD4+ T cells	0	0	0.05		0	0	0.06		0.01	0		-0.01
CD8+ T cells	-0.09	-0.01	-0.04		0	0	0.01		0.04	0.01		-0.17
