# Supplementary material for: Purging viral latency by a bifunctional HSV-vectored therapeutic vaccine in chronically SIV-infected macaques
Source: eLife. 2025 Apr 23;13:RP95964. doi: 10.7554/eLife.95964 (PMC12017772; doi:10.7554/eLife.95964)
Supplement: Figure 5—source data 1. [file elife-95964-fig5-data1.xlsx]

## Sheet: Figure 5C
Day/VL	#7		#8		#9
0	981522	988614	13921.1	16666.2	7519.38	5587.17
7	257.753	837.329	80.0128	372.53	125.442	138.63
25	240.721	378.63	114.219	32.3501	245.8	177.159
33	32.3501	42.3701	112.822	43.6596	161.951	117.373
39	32.3501	32.3501	32.3501	61.7876	32.3501	32.3501
46	135.311		36.2257		136.687
52	50.7129		673.799		775.723
60	412.737		880.247		32.339
63	553.145		495.611		79.7233
70	760.744		938.315		1527.1	3206.4
76	32.339	138.424	157.429	536.381	288.023	482.475
81	500.328	272.839	287.747	32.339	72.4032	1255.77
89	4993.36	4998.54	162.599	58.4353	37747	34023.8
94	7369.44	13616.3	1036.12	661.49	34334.6	25176.8
101	1907.91	6141.48	904.389	3364.56	66341.6	75730.4
108	2065.53	2718.69	896.988	8307.28	55740.3	55526.6

## Sheet: Figure 5D
	#1		#2		#3		#4		#5		#6		#7		#8		#9
Before ART	520608	538919	9002.34	13598.4	1014.3	901.785	21115.7	23675.9	397989	350612	2236.5	1274.08	981522	988614	13921.1	16666.2	7519.38	5587.17
Peak of viral rebound	4739890	4606791	8954.02	6001.3	1826.51	1070.65	405988	372953	729254	678514	331.787	1410.47	7369.44	13616.3	1036.12	661.49	66341.6	75730.4

## Sheet: Figure 5E
	#1		#2		#3		#4		#5		#6		#7		#8		#9
pre-ART	56.8542	40.7797	96.5384	98.7112	42.2292	40.7366	28.265	28.6608	27.7126	26.4545	55.0026	58.7708	172.902	167.25	14.2716	16.3162	49.5015	66.9224
Rebound	482.234	478.134	202.092	204.423	1115.08	962.389	1747.77	1680.7	634.26	625.384	273.456	261.64	54.6994	69.8494	149.882	152.9	83.6184	65.8811

## Sheet: Figure 5F
	#1	#2	#3	#4	#5	#6	#7	#8	#9
pre-ART	130.349	142.774	73.9843	86.3228	122.297	60.1926	162.75	25.0324	101.752
During vaccination	81.2287	97.1642	22.5709	51.5923	136.06	32.0141	55.0664	61.9613	89.2656
Rebound	161.44	95.8658	164.775	186.072	170.13	43.8843	82.2393	60.1376	71.3821

## Sheet: Figure 5G
	#1		#2		#13		ART+saline mean		#4		#5		#6		ART+HSV-empty mean		#7		#8		#9		ART+HSV-sPD1-SIVgag/SIVenv mean
Before	585	445	400	270	600	755	510		215	230	70	55	270	210	175		560	240	420	285	170	210	315
After	485	425	370	420	320	335	393		430	410	50	50	425	415	297		335	180	475	485	1085	505	511

## Sheet: Figure 5H
CD4/CD8	ART+saline mean	ART+HSV-empty mean	ART+HSV-sPD1-SIVgag/SIVenv mean
Pre-ART	0.533333	0.607468	0.733333
During Vaccination	0.666667	0.734366	0.8
Rebound	0.595263	0.694833	0.817771
